# Supplementary material
Source: PubMed Central journal article supplement (PMC3457475)
Supplement: AEM.01776-12_zam999103705so1.pdf [file AEM.01776-12_zam999103705so1.pdf]

**Table S1. Oligonucleotide primers used in this study**

| Purpose                                                             | Primer        | Sequence (5'-3')                      |
|---------------------------------------------------------------------|---------------|---------------------------------------|
| Cloning <i>serR</i> gene in pNZ44                                   | SerR-for      | CTTCGACTGCAGCATGACATGTCAGGACGGAG      |
|                                                                     | SerR-rev      | GTCCGTCTAGACCATGCCAACTCTTAAATCTC      |
| Cloning <i>serR</i> gene in pQE30                                   | serR-p30F     | GTCCGTAAGCTCCATGCCAACTCTTAAATCTC      |
|                                                                     | serR-p30R     | GTCCGTAAGCTCCATGCCAACTCTTAAATCTC      |
| Cloning <i>serR</i> C-terminal fragment in pQE30                    | serR-CterF    | CTTCGCGGATCCCGATTGAACGGCATTG          |
|                                                                     | serR-CterR    | GTCCGTAAGCTCCATGCCAACTCTTAAATCTC      |
| Primers for <i>ser<sub>2003</sub></i> upstream region amplification | Serpin-AF     | GTTGCGGTTGCGCGCTTC                    |
|                                                                     | Serpin-AR     | CTGAGTGCTTGTGACGCTTC                  |
|                                                                     | Serpin-BF     | CTGCTCCGTCTGACATGTC                   |
|                                                                     | Serpin-BR     | CACCCCTTCAGTGTGCC                     |
|                                                                     | Serpin-CF     | GGAATCATCATCAATCCTTGAC                |
|                                                                     | Serpin-CR     | GTCGGGCATGAGATACATTG                  |
| Cloning <i>ser<sub>2003</sub></i> promoter in pUC18                 | pUC-InterF    | CTTCGAGAATTCGTTGCGGTTGCGCGCTTC        |
|                                                                     | pUC-InterR    | CTGACTTCTAGACTGAGTGCTTGTGCACGGTTC     |
| Site directed mutagenesis primers                                   | Mut-1F        | GCGCGCTTCTACCATTACATTCAACCCCTCAGTGTG  |
|                                                                     | Mut-1R        | CACACTGAAGGGTTGAATGTAATGGTAGAAGCGCGC  |
|                                                                     | Mut-2F        | GCTTCTCCAGTACATTCAACCCGTCAGTGTGCC     |
|                                                                     | Mut-2R        | GGCACACTGACGGGGTGAATGTAAGTGGGAGAAGC   |
|                                                                     | Mut-3F        | CGCGCTTCTCTATTACATTACCTCTCAGTGTGC     |
|                                                                     | Mut-3R        | GCACACTGAAGAGGTGAATGTAATAGGAGAAGCGCG  |
|                                                                     | Mut-4F        | CGCGCTTCTACCAGTACATTCAACCCGTCAGTGTGC  |
|                                                                     | Mut-4R        | GCACACTGACGGGGTGAATGTAAGTGGTAGAAGCGCG |
| Cloning promoter region of <i>ser<sub>2003</sub></i> in pNZ272      | pNZ272-InterF | CTGACTAGATCTCTGAGTGCTTGTGCACGGTTC     |
|                                                                     | pNZ272-InterR | CTGACTGAAITGTGCTTGTGTCCTGACACGGTTC    |
| Cloning of internal fragment of <i>serR</i> in pORI19               | serRKOF       | CTTCGACTGCAGGCTAATCGAGCGCATGTCCAG     |
|                                                                     | serRKOR       | GTCAGTCTAGACACAGTGGCCACGCTGATG        |

|                                                            |             |                                              |
|------------------------------------------------------------|-------------|----------------------------------------------|
| Cloning of internal fragment of <i>serU</i> gene in pORI19 | serpinKOF   | ATCGACCTGCA <del>G</del> CGCGAACTCGCTGTGGATC |
|                                                            | serpinKOR   | CTGACTTCTAGACAACCCATTGCGTCCTCGC              |
| Complementation of <i>serRK</i>                            | serRKF      | CCTGCATTCTAGACTGTTGAGCTTGCTGAGTG             |
|                                                            | serRKR      | CCTGCATGCGGCCGCGAAGTCGGTTGGGTGATCG           |
| Complementation of <i>serRU</i>                            | SerU-for    | CCTGCATCTGCAGCGTCGCACAAAATAAGAGAGA           |
|                                                            | SerU-rev    | CTTCGATCTAGAGCGGCCGCGGTATCAATCAAAGCAACAC     |
|                                                            | p44F        | CTACTCGCGCCGCGGAGAAGGGACGATAGCATT            |
| <i>tetW</i> gene amplification                             | tetWf       | TCAGCTGTCGACATGCTCATGTACGGTAAG               |
|                                                            | tetWr       | GCGACGGTCGACCATTACCTTCTGAAACAT               |
| qRT-PCR primers                                            | sagA-RT-F   | ACGATCCGGCAGTCTGTCTT                         |
|                                                            | sagA-RT-R   | CAGCGTGCAATTAGCTTCCAC                        |
|                                                            | Serpin-RT-F | GGCGATGGCAGCGTACTGGT                         |
|                                                            | Serpin-RT-R | ATGGCCAACGCCATCCACAT                         |
| <i>rpnA</i>                                                | rnpA-F      | GCATCGTTCTCATCGTTGG                          |
| <i>rpnA</i>                                                | rnpA-R      | CGCCTTAGCAGCCACTT                            |
| <i>atpD</i>                                                | atpD-F      | CGTATGCCTTCCGCCGTGGGTTAC                     |
| <i>atpD</i>                                                | atpD-R      | ACGTAGATGGCTTGACGCGAGGTG                     |
| <i>tufA</i>                                                | tufA-F      | AGACCACCACCGTCACCTCCATCG                     |
| <i>tufA</i>                                                | tufA-R      | GCCAAGACCACGACGACGAGAC                       |
| <i>rpoB</i>                                                | rpoB-F      | CACGATGGTGCTGCGACCTTCCC                      |
| <i>rpoB</i>                                                | rpoB-R      | GACCTGACGGATACGACGGTTGCC                     |
| <i>ldh</i>                                                 | ldH-F       | GTGATGGGCGAGCATGGCGACTC                      |
| <i>ldh</i>                                                 | ldh-R       | GGAGGCCAAGCGGCTTGGTTGTC                      |
| <i>uvrD/Rep</i>                                            | uvrD/Rep-F  | TAACGCATTGCCTGGTATGA                         |
| <i>uvrD/Rep</i>                                            | uvrD/Rep-R  | TCCGCAAGTATACGGGTTTC                         |
| <i>pdxS</i>                                                | pdxS-F      | GATCAAGGGCATTGAGGAAG                         |
| <i>pdxS</i>                                                | pdxS-R      | CGAACTGGTTCTTGTGATG                          |
| <i>gluC</i>                                                | gluC-F      | CTTCGCCACGAACTTCTTCT                         |
| <i>gluC</i>                                                | gluC-R      | GTTCTTGAGCAGTGGATCA                          |

<sup>a</sup> Underlined oligonucleotide sequences show artificial restriction enzyme sites introduced for cloning.
